# Supplementary material
Source: publisher figshare collection journal article supplement (https://acs.figshare.com/ndownloader/files/4500034)
Supplement: Supplementary file 1 [file 4500034]

 
data_2j
 
_audit_creation_method            SHELXL-97

_publ_contact_author   "Christophe M.L. Vande Velde" 

_publ_contact_author_email "christophe.vandevelde@kdg.be"

loop_
_publ_author_name
"Oxana Ryabtsova"
"Tom Verhelst"
"Mattijs Baeten"
"Bert U.W. Maes"

_journal_name_full 
"Journal of Organic Chemistry"

_chemical_name_systematic
;
 4,4'[hydroxy(phenyl)methylene]bis(2-benzyl-5-methoxypyridazin-3(2H)one
;
_chemical_name_common             ?
_chemical_melting_point           ?
_chemical_formula_moiety           'C31 H28 N4 O5'
_chemical_formula_sum
 'C31 H28 N4 O5'
_chemical_formula_weight          536.57
 
loop_
 _atom_type_symbol
 _atom_type_description
 _atom_type_scat_dispersion_real
 _atom_type_scat_dispersion_imag
 _atom_type_scat_source
 'C'  'C'   0.0033   0.0016
 'International Tables Vol C Tables 4.2.6.8 and 6.1.1.4'
 'H'  'H'   0.0000   0.0000
 'International Tables Vol C Tables 4.2.6.8 and 6.1.1.4'
 'N'  'N'   0.0061   0.0033
 'International Tables Vol C Tables 4.2.6.8 and 6.1.1.4'
 'O'  'O'   0.0106   0.0060
 'International Tables Vol C Tables 4.2.6.8 and 6.1.1.4'
 
_symmetry_cell_setting            triclinic
_symmetry_space_group_name_H-M    P-1
_symmetry_space_group_name_Hall   -P1
loop_
 _symmetry_equiv_pos_as_xyz
 'x, y, z'
 '-x, -y, -z'
 
_cell_length_a                    8.0694(11)
_cell_length_b                    12.6468(18)
_cell_length_c                    13.1813(18)
_cell_angle_alpha                 79.055(2)
_cell_angle_beta                  83.076(2)
_cell_angle_gamma                 81.635(2)
_cell_volume                      1300.7(3)
_cell_formula_units_Z             2
_cell_measurement_temperature     100(2)
_cell_measurement_reflns_used     5171
_cell_measurement_theta_min       2.87
_cell_measurement_theta_max       30.19
 
_exptl_crystal_description        block
_exptl_crystal_colour             colourless
_exptl_crystal_size_max           0.55
_exptl_crystal_size_mid           0.51
_exptl_crystal_size_min           0.41
_exptl_crystal_density_meas       ?
_exptl_crystal_density_diffrn     1.370
_exptl_crystal_density_method     'not measured'
_exptl_crystal_F_000              564
_exptl_absorpt_coefficient_mu     0.095
_exptl_absorpt_correction_type    multi-scan
_exptl_absorpt_correction_T_min   0.6895
_exptl_absorpt_correction_T_max   0.7465
_exptl_absorpt_process_details    "SADABS 2008/1 (Bruker, 2008)"
 
_exptl_special_details
;
 ?
;
 
_diffrn_ambient_temperature       100(2)
_diffrn_radiation_wavelength      0.71073
_diffrn_radiation_type            MoK\a
_diffrn_radiation_source          'fine-focus sealed tube'
_diffrn_radiation_monochromator   graphite
_diffrn_measurement_device_type   
;
area detector diffractometer Bruker Smart APEX
;
_diffrn_measurement_method        \w-scans
_diffrn_detector_area_resol_mean  .
_diffrn_standards_number          .
_diffrn_standards_interval_count  .
_diffrn_standards_interval_time   .
_diffrn_standards_decay_%         .
_diffrn_reflns_number             28084
_diffrn_reflns_av_R_equivalents   0.0233
_diffrn_reflns_av_sigmaI/netI     0.0241
_diffrn_reflns_limit_h_min        -11
_diffrn_reflns_limit_h_max        11
_diffrn_reflns_limit_k_min        -17
_diffrn_reflns_limit_k_max        18
_diffrn_reflns_limit_l_min        -19
_diffrn_reflns_limit_l_max        19
_diffrn_reflns_theta_min          2.08
_diffrn_reflns_theta_max          31.90
_reflns_number_total              8218
_reflns_number_gt                 6929
_reflns_threshold_expression      >2sigma(I)
 
_computing_data_collection        "Bruker SAINT (Bruker, 2008)"
_computing_cell_refinement        "Bruker SAINT (Bruker, 2008)"
_computing_data_reduction         "Bruker SAINT (Bruker, 2008)"
_computing_structure_solution     "SHELXS-86 (Sheldrick, 2008)"
_computing_structure_refinement   'SHELXL-97 (Sheldrick, 2008)'
_computing_molecular_graphics     
;
ORTEP-3 for Windows (Farrugia, 1997), Mercury (Bruno, 2002)
;

_computing_publication_material   
;
WinGX (Farrugia, 1999), PLATON (Spek, 2008)
;
 
_refine_special_details
;
 Refinement of F^2^ against ALL reflections.  The weighted R-factor wR and
 goodness of fit S are based on F^2^, conventional R-factors R are based
 on F, with F set to zero for negative F^2^. The threshold expression of
 F^2^ > 2sigma(F^2^) is used only for calculating R-factors(gt) etc. and is
 not relevant to the choice of reflections for refinement.  R-factors based
 on F^2^ are statistically about twice as large as those based on F, and R-
 factors based on ALL data will be even larger.
;
 
_refine_ls_structure_factor_coef  Fsqd
_refine_ls_matrix_type            full
_refine_ls_weighting_scheme       calc
_refine_ls_weighting_details
 'calc w=1/[\s^2^(Fo^2^)+(0.0580P)^2^+0.4280P] where P=(Fo^2^+2Fc^2^)/3'
_atom_sites_solution_primary      direct
_atom_sites_solution_secondary    difmap
_atom_sites_solution_hydrogens    geom
_refine_ls_hydrogen_treatment     riding
_refine_ls_extinction_method      none
_refine_ls_extinction_coef        ?
_refine_ls_number_reflns          8218
_refine_ls_number_parameters      364
_refine_ls_number_restraints      0
_refine_ls_R_factor_all           0.0522
_refine_ls_R_factor_gt            0.0429
_refine_ls_wR_factor_ref          0.1181
_refine_ls_wR_factor_gt           0.1102
_refine_ls_goodness_of_fit_ref    1.038
_refine_ls_restrained_S_all       1.038
_refine_ls_shift/su_max           0.000
_refine_ls_shift/su_mean          0.000
 
loop_
 _atom_site_label
 _atom_site_type_symbol
 _atom_site_fract_x
 _atom_site_fract_y
 _atom_site_fract_z
 _atom_site_U_iso_or_equiv
 _atom_site_adp_type
 _atom_site_occupancy
 _atom_site_symmetry_multiplicity
 _atom_site_calc_flag
 _atom_site_refinement_flags
 _atom_site_disorder_assembly
 _atom_site_disorder_group
C23 C 0.71504(12) 0.24816(8) 0.31559(7) 0.01592(17) Uani 1 1 d . . .
N22 N 0.84012(11) 0.22794(7) 0.38430(6) 0.01724(16) Uani 1 1 d . . .
N21 N 0.89203(11) 0.13084(7) 0.44049(7) 0.01920(17) Uani 1 1 d . . .
C26 C 0.81782(12) 0.04852(8) 0.43217(8) 0.01875(18) Uani 1 1 d . . .
H26 H 0.8543 -0.0193 0.4695 0.023 Uiso 1 1 calc R . .
C25 C 0.68255(12) 0.05688(8) 0.36838(7) 0.01683(17) Uani 1 1 d . . .
C24 C 0.63123(12) 0.15517(7) 0.30897(7) 0.01515(17) Uani 1 1 d . . .
C10 C 0.48006(11) 0.18208(7) 0.24431(7) 0.01432(16) Uani 1 1 d . . .
C4 C 0.52232(12) 0.24978(7) 0.13600(7) 0.01490(17) Uani 1 1 d . . .
C3 C 0.38553(12) 0.32189(8) 0.08897(7) 0.01649(17) Uani 1 1 d . . .
N2 N 0.42511(11) 0.38217(7) -0.00837(6) 0.01829(16) Uani 1 1 d . . .
N1 N 0.57642(12) 0.37527(7) -0.06361(7) 0.02053(17) Uani 1 1 d . . .
C6 C 0.69685(13) 0.30671(8) -0.02172(8) 0.01943(19) Uani 1 1 d . . .
H6 H 0.8023 0.3008 -0.0590 0.023 Uiso 1 1 calc R . .
C5 C 0.67535(12) 0.24026(8) 0.07838(7) 0.01662(17) Uani 1 1 d . . .
C27 C 0.91164(13) 0.32022(8) 0.40718(8) 0.01944(18) Uani 1 1 d . . .
H27B H 0.9274 0.3726 0.3438 0.023 Uiso 1 1 calc R . .
H27A H 1.0210 0.2949 0.4325 0.023 Uiso 1 1 calc R . .
C31 C 0.79866(12) 0.37494(8) 0.48743(8) 0.01867(18) Uani 1 1 d . . .
C32 C 0.78360(15) 0.48733(9) 0.48030(9) 0.0253(2) Uani 1 1 d . . .
H32 H 0.8422 0.5287 0.4255 0.030 Uiso 1 1 calc R . .
C33 C 0.68159(16) 0.53817(10) 0.55460(10) 0.0294(2) Uani 1 1 d . . .
H33 H 0.6733 0.6131 0.5494 0.035 Uiso 1 1 calc R . .
C34 C 0.59257(15) 0.47764(11) 0.63609(9) 0.0297(2) Uani 1 1 d . . .
H34 H 0.5236 0.5118 0.6852 0.036 Uiso 1 1 calc R . .
C35 C 0.60686(15) 0.36554(11) 0.64407(9) 0.0282(2) Uani 1 1 d . . .
H35 H 0.5476 0.3246 0.6988 0.034 Uiso 1 1 calc R . .
C36 C 0.70950(14) 0.31444(9) 0.57040(8) 0.0226(2) Uani 1 1 d . . .
H36 H 0.7188 0.2394 0.5764 0.027 Uiso 1 1 calc R . .
C28 C 0.65378(15) -0.13095(8) 0.43577(8) 0.0239(2) Uani 1 1 d . . .
H28A H 0.7699 -0.1565 0.4186 0.036 Uiso 1 1 calc R . .
H28C H 0.5849 -0.1844 0.4285 0.036 Uiso 1 1 calc R . .
H28B H 0.6381 -0.1185 0.5061 0.036 Uiso 1 1 calc R . .
C41 C 0.40447(12) 0.08290(7) 0.22551(7) 0.01479(17) Uani 1 1 d . . .
C42 C 0.25558(13) 0.05390(8) 0.28173(8) 0.01902(18) Uani 1 1 d . . .
H42 H 0.2022 0.0941 0.3313 0.023 Uiso 1 1 calc R . .
C43 C 0.18587(14) -0.03477(9) 0.26433(9) 0.0240(2) Uani 1 1 d . . .
H43 H 0.0879 -0.0545 0.3036 0.029 Uiso 1 1 calc R . .
C44 C 0.26152(15) -0.09396(9) 0.18878(9) 0.0240(2) Uani 1 1 d . . .
H44 H 0.2143 -0.1528 0.1769 0.029 Uiso 1 1 calc R . .
C45 C 0.40849(14) -0.06416(8) 0.13124(8) 0.0219(2) Uani 1 1 d . . .
H45 H 0.4591 -0.1027 0.0798 0.026 Uiso 1 1 calc R . .
C46 C 0.48046(13) 0.02281(8) 0.14999(8) 0.01845(18) Uani 1 1 d . . .
H46 H 0.5801 0.0411 0.1119 0.022 Uiso 1 1 calc R . .
C7 C 0.29231(14) 0.45479(8) -0.06214(8) 0.0219(2) Uani 1 1 d . . .
H7A H 0.3418 0.5139 -0.1080 0.026 Uiso 1 1 calc R . .
H7B H 0.2124 0.4859 -0.0113 0.026 Uiso 1 1 calc R . .
C11 C 0.19937(13) 0.39834(8) -0.12493(8) 0.01971(19) Uani 1 1 d . . .
C16 C 0.05411(14) 0.45443(10) -0.16677(9) 0.0280(2) Uani 1 1 d . . .
H16 H 0.0130 0.5233 -0.1526 0.034 Uiso 1 1 calc R . .
C15 C -0.02923(16) 0.40707(13) -0.22973(10) 0.0372(3) Uani 1 1 d . . .
H15 H -0.1256 0.4448 -0.2579 0.045 Uiso 1 1 calc R . .
C14 C 0.03023(17) 0.30424(13) -0.25080(9) 0.0363(3) Uani 1 1 d . . .
H14 H -0.0253 0.2735 -0.2936 0.044 Uiso 1 1 calc R . .
C13 C 0.17200(17) 0.24758(11) -0.20805(9) 0.0313(3) Uani 1 1 d . . .
H13 H 0.2112 0.1781 -0.2210 0.038 Uiso 1 1 calc R . .
C12 C 0.25636(14) 0.29482(9) -0.14535(9) 0.0244(2) Uani 1 1 d . . .
H12 H 0.3521 0.2565 -0.1168 0.029 Uiso 1 1 calc R . .
C8 C 0.96876(14) 0.17081(12) 0.06437(10) 0.0344(3) Uani 1 1 d . . .
H8A H 0.9705 0.1545 -0.0040 0.052 Uiso 1 1 calc R . .
H8B H 1.0466 0.1183 0.1030 0.052 Uiso 1 1 calc R . .
H8C H 1.0005 0.2420 0.0593 0.052 Uiso 1 1 calc R . .
O23 O 0.68413(10) 0.34044(6) 0.26642(6) 0.02008(15) Uani 1 1 d . . .
O25 O 0.60670(10) -0.03139(6) 0.36706(6) 0.02428(17) Uani 1 1 d . . .
O10 O 0.36052(9) 0.24467(6) 0.30561(5) 0.01747(14) Uani 1 1 d . . .
H10 H 0.2894 0.2803 0.2692 0.026 Uiso 1 1 calc R . .
O5 O 0.80182(9) 0.16717(6) 0.11656(6) 0.02074(15) Uani 1 1 d . . .
O3 O 0.23777(9) 0.33249(6) 0.12956(6) 0.02118(15) Uani 1 1 d . . .
 
loop_
 _atom_site_aniso_label
 _atom_site_aniso_U_11
 _atom_site_aniso_U_22
 _atom_site_aniso_U_33
 _atom_site_aniso_U_23
 _atom_site_aniso_U_13
 _atom_site_aniso_U_12
C23 0.0165(4) 0.0177(4) 0.0133(4) -0.0024(3) -0.0015(3) -0.0017(3)
N22 0.0183(4) 0.0174(4) 0.0159(4) -0.0013(3) -0.0037(3) -0.0020(3)
N21 0.0182(4) 0.0203(4) 0.0175(4) -0.0002(3) -0.0035(3) 0.0003(3)
C26 0.0191(4) 0.0187(4) 0.0169(4) -0.0002(3) -0.0040(3) 0.0007(3)
C25 0.0181(4) 0.0171(4) 0.0149(4) -0.0019(3) -0.0023(3) -0.0015(3)
C24 0.0169(4) 0.0156(4) 0.0124(4) -0.0017(3) -0.0012(3) -0.0015(3)
C10 0.0148(4) 0.0145(4) 0.0127(4) -0.0012(3) -0.0004(3) -0.0008(3)
C4 0.0175(4) 0.0145(4) 0.0126(4) -0.0011(3) -0.0021(3) -0.0028(3)
C3 0.0211(4) 0.0139(4) 0.0145(4) -0.0007(3) -0.0038(3) -0.0029(3)
N2 0.0234(4) 0.0162(4) 0.0147(4) 0.0008(3) -0.0043(3) -0.0032(3)
N1 0.0272(4) 0.0201(4) 0.0146(4) -0.0009(3) -0.0013(3) -0.0076(3)
C6 0.0228(5) 0.0214(4) 0.0145(4) -0.0021(3) 0.0009(3) -0.0077(4)
C5 0.0188(4) 0.0171(4) 0.0144(4) -0.0023(3) -0.0021(3) -0.0040(3)
C27 0.0184(4) 0.0211(4) 0.0196(4) -0.0024(4) -0.0033(3) -0.0053(3)
C31 0.0179(4) 0.0208(4) 0.0184(4) -0.0030(3) -0.0064(3) -0.0027(3)
C32 0.0298(5) 0.0218(5) 0.0256(5) -0.0026(4) -0.0094(4) -0.0041(4)
C33 0.0342(6) 0.0238(5) 0.0326(6) -0.0095(4) -0.0145(5) 0.0033(4)
C34 0.0253(5) 0.0380(6) 0.0281(6) -0.0149(5) -0.0089(4) 0.0059(5)
C35 0.0242(5) 0.0372(6) 0.0233(5) -0.0073(4) -0.0005(4) -0.0030(4)
C36 0.0226(5) 0.0234(5) 0.0219(5) -0.0037(4) -0.0019(4) -0.0040(4)
C28 0.0304(5) 0.0172(4) 0.0221(5) 0.0041(4) -0.0063(4) -0.0034(4)
C41 0.0160(4) 0.0147(4) 0.0128(4) 0.0002(3) -0.0025(3) -0.0014(3)
C42 0.0188(4) 0.0208(4) 0.0168(4) -0.0025(3) 0.0002(3) -0.0029(3)
C43 0.0218(5) 0.0248(5) 0.0255(5) -0.0028(4) 0.0009(4) -0.0084(4)
C44 0.0292(5) 0.0195(5) 0.0248(5) -0.0033(4) -0.0041(4) -0.0075(4)
C45 0.0298(5) 0.0173(4) 0.0183(4) -0.0035(3) -0.0009(4) -0.0023(4)
C46 0.0207(4) 0.0168(4) 0.0165(4) -0.0018(3) 0.0011(3) -0.0019(3)
C7 0.0304(5) 0.0161(4) 0.0176(4) 0.0014(3) -0.0073(4) 0.0011(4)
C11 0.0202(5) 0.0225(5) 0.0143(4) 0.0019(3) -0.0018(3) -0.0026(4)
C16 0.0206(5) 0.0318(6) 0.0251(5) 0.0098(4) -0.0022(4) -0.0010(4)
C15 0.0225(5) 0.0552(8) 0.0287(6) 0.0171(6) -0.0095(4) -0.0140(5)
C14 0.0355(7) 0.0567(8) 0.0201(5) 0.0037(5) -0.0060(5) -0.0280(6)
C13 0.0359(6) 0.0385(6) 0.0234(5) -0.0086(5) -0.0010(4) -0.0154(5)
C12 0.0240(5) 0.0275(5) 0.0226(5) -0.0056(4) -0.0044(4) -0.0030(4)
C8 0.0164(5) 0.0523(8) 0.0283(6) 0.0039(5) 0.0022(4) -0.0019(5)
O23 0.0248(4) 0.0164(3) 0.0188(3) -0.0003(3) -0.0054(3) -0.0028(3)
O25 0.0320(4) 0.0153(3) 0.0259(4) 0.0043(3) -0.0138(3) -0.0054(3)
O10 0.0180(3) 0.0183(3) 0.0147(3) -0.0036(2) -0.0001(2) 0.0023(2)
O5 0.0154(3) 0.0262(4) 0.0178(3) -0.0002(3) 0.0013(3) -0.0006(3)
O3 0.0184(3) 0.0222(4) 0.0205(3) 0.0005(3) -0.0028(3) 0.0009(3)
 
_geom_special_details
;
 All esds (except the esd in the dihedral angle between two l.s. planes)
 are estimated using the full covariance matrix.  The cell esds are taken
 into account individually in the estimation of esds in distances, angles
 and torsion angles; correlations between esds in cell parameters are only
 used when they are defined by crystal symmetry.  An approximate (isotropic)
 treatment of cell esds is used for estimating esds involving l.s. planes.
;
 
loop_
 _geom_bond_atom_site_label_1
 _geom_bond_atom_site_label_2
 _geom_bond_distance
 _geom_bond_site_symmetry_2
 _geom_bond_publ_flag
C23 O23 1.2293(12) . ?
C23 N22 1.4007(12) . ?
C23 C24 1.4605(13) . ?
N22 N21 1.3460(12) . ?
N22 C27 1.4688(13) . ?
N21 C26 1.3020(14) . ?
C26 C25 1.4366(14) . ?
C26 H26 0.9300 . ?
C25 O25 1.3526(12) . ?
C25 C24 1.3743(13) . ?
C24 C10 1.5329(13) . ?
C10 O10 1.4292(11) . ?
C10 C41 1.5440(13) . ?
C10 C4 1.5464(13) . ?
C4 C5 1.3717(13) . ?
C4 C3 1.4463(13) . ?
C3 O3 1.2460(12) . ?
C3 N2 1.3893(12) . ?
N2 N1 1.3445(12) . ?
N2 C7 1.4642(13) . ?
N1 C6 1.3052(14) . ?
C6 C5 1.4296(14) . ?
C6 H6 0.9300 . ?
C5 O5 1.3498(12) . ?
C27 C31 1.5135(14) . ?
C27 H27B 0.9700 . ?
C27 H27A 0.9700 . ?
C31 C32 1.3949(15) . ?
C31 C36 1.3971(15) . ?
C32 C33 1.3931(17) . ?
C32 H32 0.9300 . ?
C33 C34 1.3848(19) . ?
C33 H33 0.9300 . ?
C34 C35 1.3903(18) . ?
C34 H34 0.9300 . ?
C35 C36 1.3912(15) . ?
C35 H35 0.9300 . ?
C36 H36 0.9300 . ?
C28 O25 1.4355(12) . ?
C28 H28A 0.9600 . ?
C28 H28C 0.9600 . ?
C28 H28B 0.9600 . ?
C41 C42 1.3919(13) . ?
C41 C46 1.3960(13) . ?
C42 C43 1.3925(15) . ?
C42 H42 0.9300 . ?
C43 C44 1.3887(16) . ?
C43 H43 0.9300 . ?
C44 C45 1.3886(16) . ?
C44 H44 0.9300 . ?
C45 C46 1.3900(14) . ?
C45 H45 0.9300 . ?
C46 H46 0.9300 . ?
C7 C11 1.5123(15) . ?
C7 H7A 0.9700 . ?
C7 H7B 0.9700 . ?
C11 C12 1.3881(15) . ?
C11 C16 1.3952(15) . ?
C16 C15 1.3930(19) . ?
C16 H16 0.9300 . ?
C15 C14 1.386(2) . ?
C15 H15 0.9300 . ?
C14 C13 1.3795(19) . ?
C14 H14 0.9300 . ?
C13 C12 1.3946(16) . ?
C13 H13 0.9300 . ?
C12 H12 0.9300 . ?
C8 O5 1.4396(13) . ?
C8 H8A 0.9600 . ?
C8 H8B 0.9600 . ?
C8 H8C 0.9600 . ?
O10 H10 0.8200 . ?
 
loop_
 _geom_angle_atom_site_label_1
 _geom_angle_atom_site_label_2
 _geom_angle_atom_site_label_3
 _geom_angle
 _geom_angle_site_symmetry_1
 _geom_angle_site_symmetry_3
 _geom_angle_publ_flag
O23 C23 N22 118.84(9) . . ?
O23 C23 C24 125.34(9) . . ?
N22 C23 C24 115.82(8) . . ?
N21 N22 C23 125.72(8) . . ?
N21 N22 C27 115.12(8) . . ?
C23 N22 C27 118.85(8) . . ?
C26 N21 N22 117.53(8) . . ?
N21 C26 C25 123.46(9) . . ?
N21 C26 H26 118.3 . . ?
C25 C26 H26 118.3 . . ?
O25 C25 C24 120.50(9) . . ?
O25 C25 C26 120.11(9) . . ?
C24 C25 C26 119.39(9) . . ?
C25 C24 C23 118.01(9) . . ?
C25 C24 C10 126.75(9) . . ?
C23 C24 C10 114.86(8) . . ?
O10 C10 C24 102.49(7) . . ?
O10 C10 C41 110.13(7) . . ?
C24 C10 C41 115.18(7) . . ?
O10 C10 C4 110.38(7) . . ?
C24 C10 C4 112.35(7) . . ?
C41 C10 C4 106.34(7) . . ?
C5 C4 C3 117.88(8) . . ?
C5 C4 C10 124.96(8) . . ?
C3 C4 C10 116.95(8) . . ?
O3 C3 N2 119.08(9) . . ?
O3 C3 C4 124.54(9) . . ?
N2 C3 C4 116.38(8) . . ?
N1 N2 C3 125.63(8) . . ?
N1 N2 C7 114.66(8) . . ?
C3 N2 C7 119.55(9) . . ?
C6 N1 N2 117.14(8) . . ?
N1 C6 C5 123.49(9) . . ?
N1 C6 H6 118.3 . . ?
C5 C6 H6 118.3 . . ?
O5 C5 C4 119.40(8) . . ?
O5 C5 C6 121.29(9) . . ?
C4 C5 C6 119.30(9) . . ?
N22 C27 C31 111.60(8) . . ?
N22 C27 H27B 109.3 . . ?
C31 C27 H27B 109.3 . . ?
N22 C27 H27A 109.3 . . ?
C31 C27 H27A 109.3 . . ?
H27B C27 H27A 108.0 . . ?
C32 C31 C36 118.74(10) . . ?
C32 C31 C27 120.21(9) . . ?
C36 C31 C27 121.04(9) . . ?
C33 C32 C31 120.57(11) . . ?
C33 C32 H32 119.7 . . ?
C31 C32 H32 119.7 . . ?
C34 C33 C32 120.29(11) . . ?
C34 C33 H33 119.9 . . ?
C32 C33 H33 119.9 . . ?
C33 C34 C35 119.64(11) . . ?
C33 C34 H34 120.2 . . ?
C35 C34 H34 120.2 . . ?
C34 C35 C36 120.22(11) . . ?
C34 C35 H35 119.9 . . ?
C36 C35 H35 119.9 . . ?
C35 C36 C31 120.54(10) . . ?
C35 C36 H36 119.7 . . ?
C31 C36 H36 119.7 . . ?
O25 C28 H28A 109.5 . . ?
O25 C28 H28C 109.5 . . ?
H28A C28 H28C 109.5 . . ?
O25 C28 H28B 109.5 . . ?
H28A C28 H28B 109.5 . . ?
H28C C28 H28B 109.5 . . ?
C42 C41 C46 118.74(9) . . ?
C42 C41 C10 120.26(8) . . ?
C46 C41 C10 120.97(8) . . ?
C41 C42 C43 120.52(9) . . ?
C41 C42 H42 119.7 . . ?
C43 C42 H42 119.7 . . ?
C44 C43 C42 120.50(10) . . ?
C44 C43 H43 119.7 . . ?
C42 C43 H43 119.7 . . ?
C45 C44 C43 119.17(10) . . ?
C45 C44 H44 120.4 . . ?
C43 C44 H44 120.4 . . ?
C44 C45 C46 120.48(10) . . ?
C44 C45 H45 119.8 . . ?
C46 C45 H45 119.8 . . ?
C45 C46 C41 120.57(9) . . ?
C45 C46 H46 119.7 . . ?
C41 C46 H46 119.7 . . ?
N2 C7 C11 113.09(8) . . ?
N2 C7 H7A 109.0 . . ?
C11 C7 H7A 109.0 . . ?
N2 C7 H7B 109.0 . . ?
C11 C7 H7B 109.0 . . ?
H7A C7 H7B 107.8 . . ?
C12 C11 C16 119.05(10) . . ?
C12 C11 C7 122.51(9) . . ?
C16 C11 C7 118.40(10) . . ?
C15 C16 C11 119.83(12) . . ?
C15 C16 H16 120.1 . . ?
C11 C16 H16 120.1 . . ?
C14 C15 C16 120.60(12) . . ?
C14 C15 H15 119.7 . . ?
C16 C15 H15 119.7 . . ?
C13 C14 C15 119.81(12) . . ?
C13 C14 H14 120.1 . . ?
C15 C14 H14 120.1 . . ?
C14 C13 C12 119.82(13) . . ?
C14 C13 H13 120.1 . . ?
C12 C13 H13 120.1 . . ?
C11 C12 C13 120.87(11) . . ?
C11 C12 H12 119.6 . . ?
C13 C12 H12 119.6 . . ?
O5 C8 H8A 109.5 . . ?
O5 C8 H8B 109.5 . . ?
H8A C8 H8B 109.5 . . ?
O5 C8 H8C 109.5 . . ?
H8A C8 H8C 109.5 . . ?
H8B C8 H8C 109.5 . . ?
C25 O25 C28 119.37(8) . . ?
C10 O10 H10 109.5 . . ?
C5 O5 C8 118.73(8) . . ?
 
loop_
 _geom_torsion_atom_site_label_1
 _geom_torsion_atom_site_label_2
 _geom_torsion_atom_site_label_3
 _geom_torsion_atom_site_label_4
 _geom_torsion
 _geom_torsion_site_symmetry_1
 _geom_torsion_site_symmetry_2
 _geom_torsion_site_symmetry_3
 _geom_torsion_site_symmetry_4
 _geom_torsion_publ_flag
O23 C23 N22 N21 -177.51(9) . . . . ?
C24 C23 N22 N21 2.54(13) . . . . ?
O23 C23 N22 C27 9.22(13) . . . . ?
C24 C23 N22 C27 -170.73(8) . . . . ?
C23 N22 N21 C26 -1.41(14) . . . . ?
C27 N22 N21 C26 172.08(9) . . . . ?
N22 N21 C26 C25 -1.36(14) . . . . ?
N21 C26 C25 O25 -177.16(9) . . . . ?
N21 C26 C25 C24 2.82(15) . . . . ?
O25 C25 C24 C23 178.49(8) . . . . ?
C26 C25 C24 C23 -1.48(13) . . . . ?
O25 C25 C24 C10 5.95(15) . . . . ?
C26 C25 C24 C10 -174.03(8) . . . . ?
O23 C23 C24 C25 179.13(9) . . . . ?
N22 C23 C24 C25 -0.92(13) . . . . ?
O23 C23 C24 C10 -7.45(13) . . . . ?
N22 C23 C24 C10 172.49(8) . . . . ?
C25 C24 C10 O10 105.02(10) . . . . ?
C23 C24 C10 O10 -67.72(9) . . . . ?
C25 C24 C10 C41 -14.55(13) . . . . ?
C23 C24 C10 C41 172.71(8) . . . . ?
C25 C24 C10 C4 -136.51(10) . . . . ?
C23 C24 C10 C4 50.75(10) . . . . ?
O10 C10 C4 C5 147.76(9) . . . . ?
C24 C10 C4 C5 34.05(12) . . . . ?
C41 C10 C4 C5 -92.81(11) . . . . ?
O10 C10 C4 C3 -37.61(11) . . . . ?
C24 C10 C4 C3 -151.32(8) . . . . ?
C41 C10 C4 C3 81.83(9) . . . . ?
C5 C4 C3 O3 174.81(9) . . . . ?
C10 C4 C3 O3 -0.22(14) . . . . ?
C5 C4 C3 N2 -4.91(13) . . . . ?
C10 C4 C3 N2 -179.94(8) . . . . ?
O3 C3 N2 N1 -176.52(9) . . . . ?
C4 C3 N2 N1 3.21(14) . . . . ?
O3 C3 N2 C7 -1.38(14) . . . . ?
C4 C3 N2 C7 178.36(8) . . . . ?
C3 N2 N1 C6 -0.66(14) . . . . ?
C7 N2 N1 C6 -176.01(9) . . . . ?
N2 N1 C6 C5 -0.17(15) . . . . ?
C3 C4 C5 O5 -174.63(8) . . . . ?
C10 C4 C5 O5 -0.04(14) . . . . ?
C3 C4 C5 C6 4.32(14) . . . . ?
C10 C4 C5 C6 178.91(9) . . . . ?
N1 C6 C5 O5 177.13(9) . . . . ?
N1 C6 C5 C4 -1.81(15) . . . . ?
N21 N22 C27 C31 -93.41(10) . . . . ?
C23 N22 C27 C31 80.56(11) . . . . ?
N22 C27 C31 C32 -143.84(9) . . . . ?
N22 C27 C31 C36 36.99(13) . . . . ?
C36 C31 C32 C33 0.03(16) . . . . ?
C27 C31 C32 C33 -179.16(10) . . . . ?
C31 C32 C33 C34 -0.58(17) . . . . ?
C32 C33 C34 C35 0.68(17) . . . . ?
C33 C34 C35 C36 -0.24(17) . . . . ?
C34 C35 C36 C31 -0.31(17) . . . . ?
C32 C31 C36 C35 0.41(16) . . . . ?
C27 C31 C36 C35 179.59(10) . . . . ?
O10 C10 C41 C42 -12.12(12) . . . . ?
C24 C10 C41 C42 103.13(10) . . . . ?
C4 C10 C41 C42 -131.73(9) . . . . ?
O10 C10 C41 C46 165.84(8) . . . . ?
C24 C10 C41 C46 -78.90(11) . . . . ?
C4 C10 C41 C46 46.24(11) . . . . ?
C46 C41 C42 C43 1.31(15) . . . . ?
C10 C41 C42 C43 179.32(9) . . . . ?
C41 C42 C43 C44 -1.64(16) . . . . ?
C42 C43 C44 C45 0.51(17) . . . . ?
C43 C44 C45 C46 0.93(16) . . . . ?
C44 C45 C46 C41 -1.26(16) . . . . ?
C42 C41 C46 C45 0.13(14) . . . . ?
C10 C41 C46 C45 -177.86(9) . . . . ?
N1 N2 C7 C11 89.29(11) . . . . ?
C3 N2 C7 C11 -86.37(11) . . . . ?
N2 C7 C11 C12 -11.89(14) . . . . ?
N2 C7 C11 C16 170.41(9) . . . . ?
C12 C11 C16 C15 -1.31(16) . . . . ?
C7 C11 C16 C15 176.46(10) . . . . ?
C11 C16 C15 C14 0.40(17) . . . . ?
C16 C15 C14 C13 0.82(18) . . . . ?
C15 C14 C13 C12 -1.11(18) . . . . ?
C16 C11 C12 C13 1.02(16) . . . . ?
C7 C11 C12 C13 -176.65(10) . . . . ?
C14 C13 C12 C11 0.19(18) . . . . ?
C24 C25 O25 C28 -175.21(9) . . . . ?
C26 C25 O25 C28 4.77(14) . . . . ?
C4 C5 O5 C8 -169.31(10) . . . . ?
C6 C5 O5 C8 11.76(15) . . . . ?
 
_diffrn_measured_fraction_theta_max    0.919
_diffrn_reflns_theta_full              27.50
_diffrn_measured_fraction_theta_full   0.996
_refine_diff_density_max    0.437
_refine_diff_density_min   -0.316
_refine_diff_density_rms    0.052
